# Supplementary material for: Crystal structure of an assembly intermediate of respiratory Complex II
Source: PubMed Central journal article supplement (PMC5773532; doi:10.1038/s41467-017-02713-8), 2018-01-18
Supplement: 41467_2017_2713_MOESM3_ESM.pdf [file 41467_2017_2713_MOESM3_ESM.pdf]

## Description of Supplementary Files

File Name: Supplementary Movie 1

Description: **View of the FrdA<sup>H44</sup>-FAD covalent bond in the FrdA-SdhE assembly intermediate.** The movie overlays the covalent bond between FrdA<sup>H44</sup> and the FAD C8 $\alpha$  in the FrdA-SdhE complex (cyan) as compared to the FrdABCD complex (grey). Rotation allows the angles to be viewed.
